# Supplementary material for: Three new Pristimantis species in the subgenus Huicundomantis (Amphibia: Anura: Strabomantidae) from Reserva Biológica Cerro Plateado, southern Ecuador
Source: PeerJ journal article supplement (doi:10.7717/peerj.20930), 2026-03-11
Supplement: Figure_S1.pdf [file Figure_S1.pdf]

○ ML - Maximum Likelihood  
○ BI - Bayesian inference

● SH-aLRT ≥ 80 | UFBoot ≥ 95  
Boot > 75 | PP > 0.95

● Boot = 50–75 | PP = 0.90–0.95

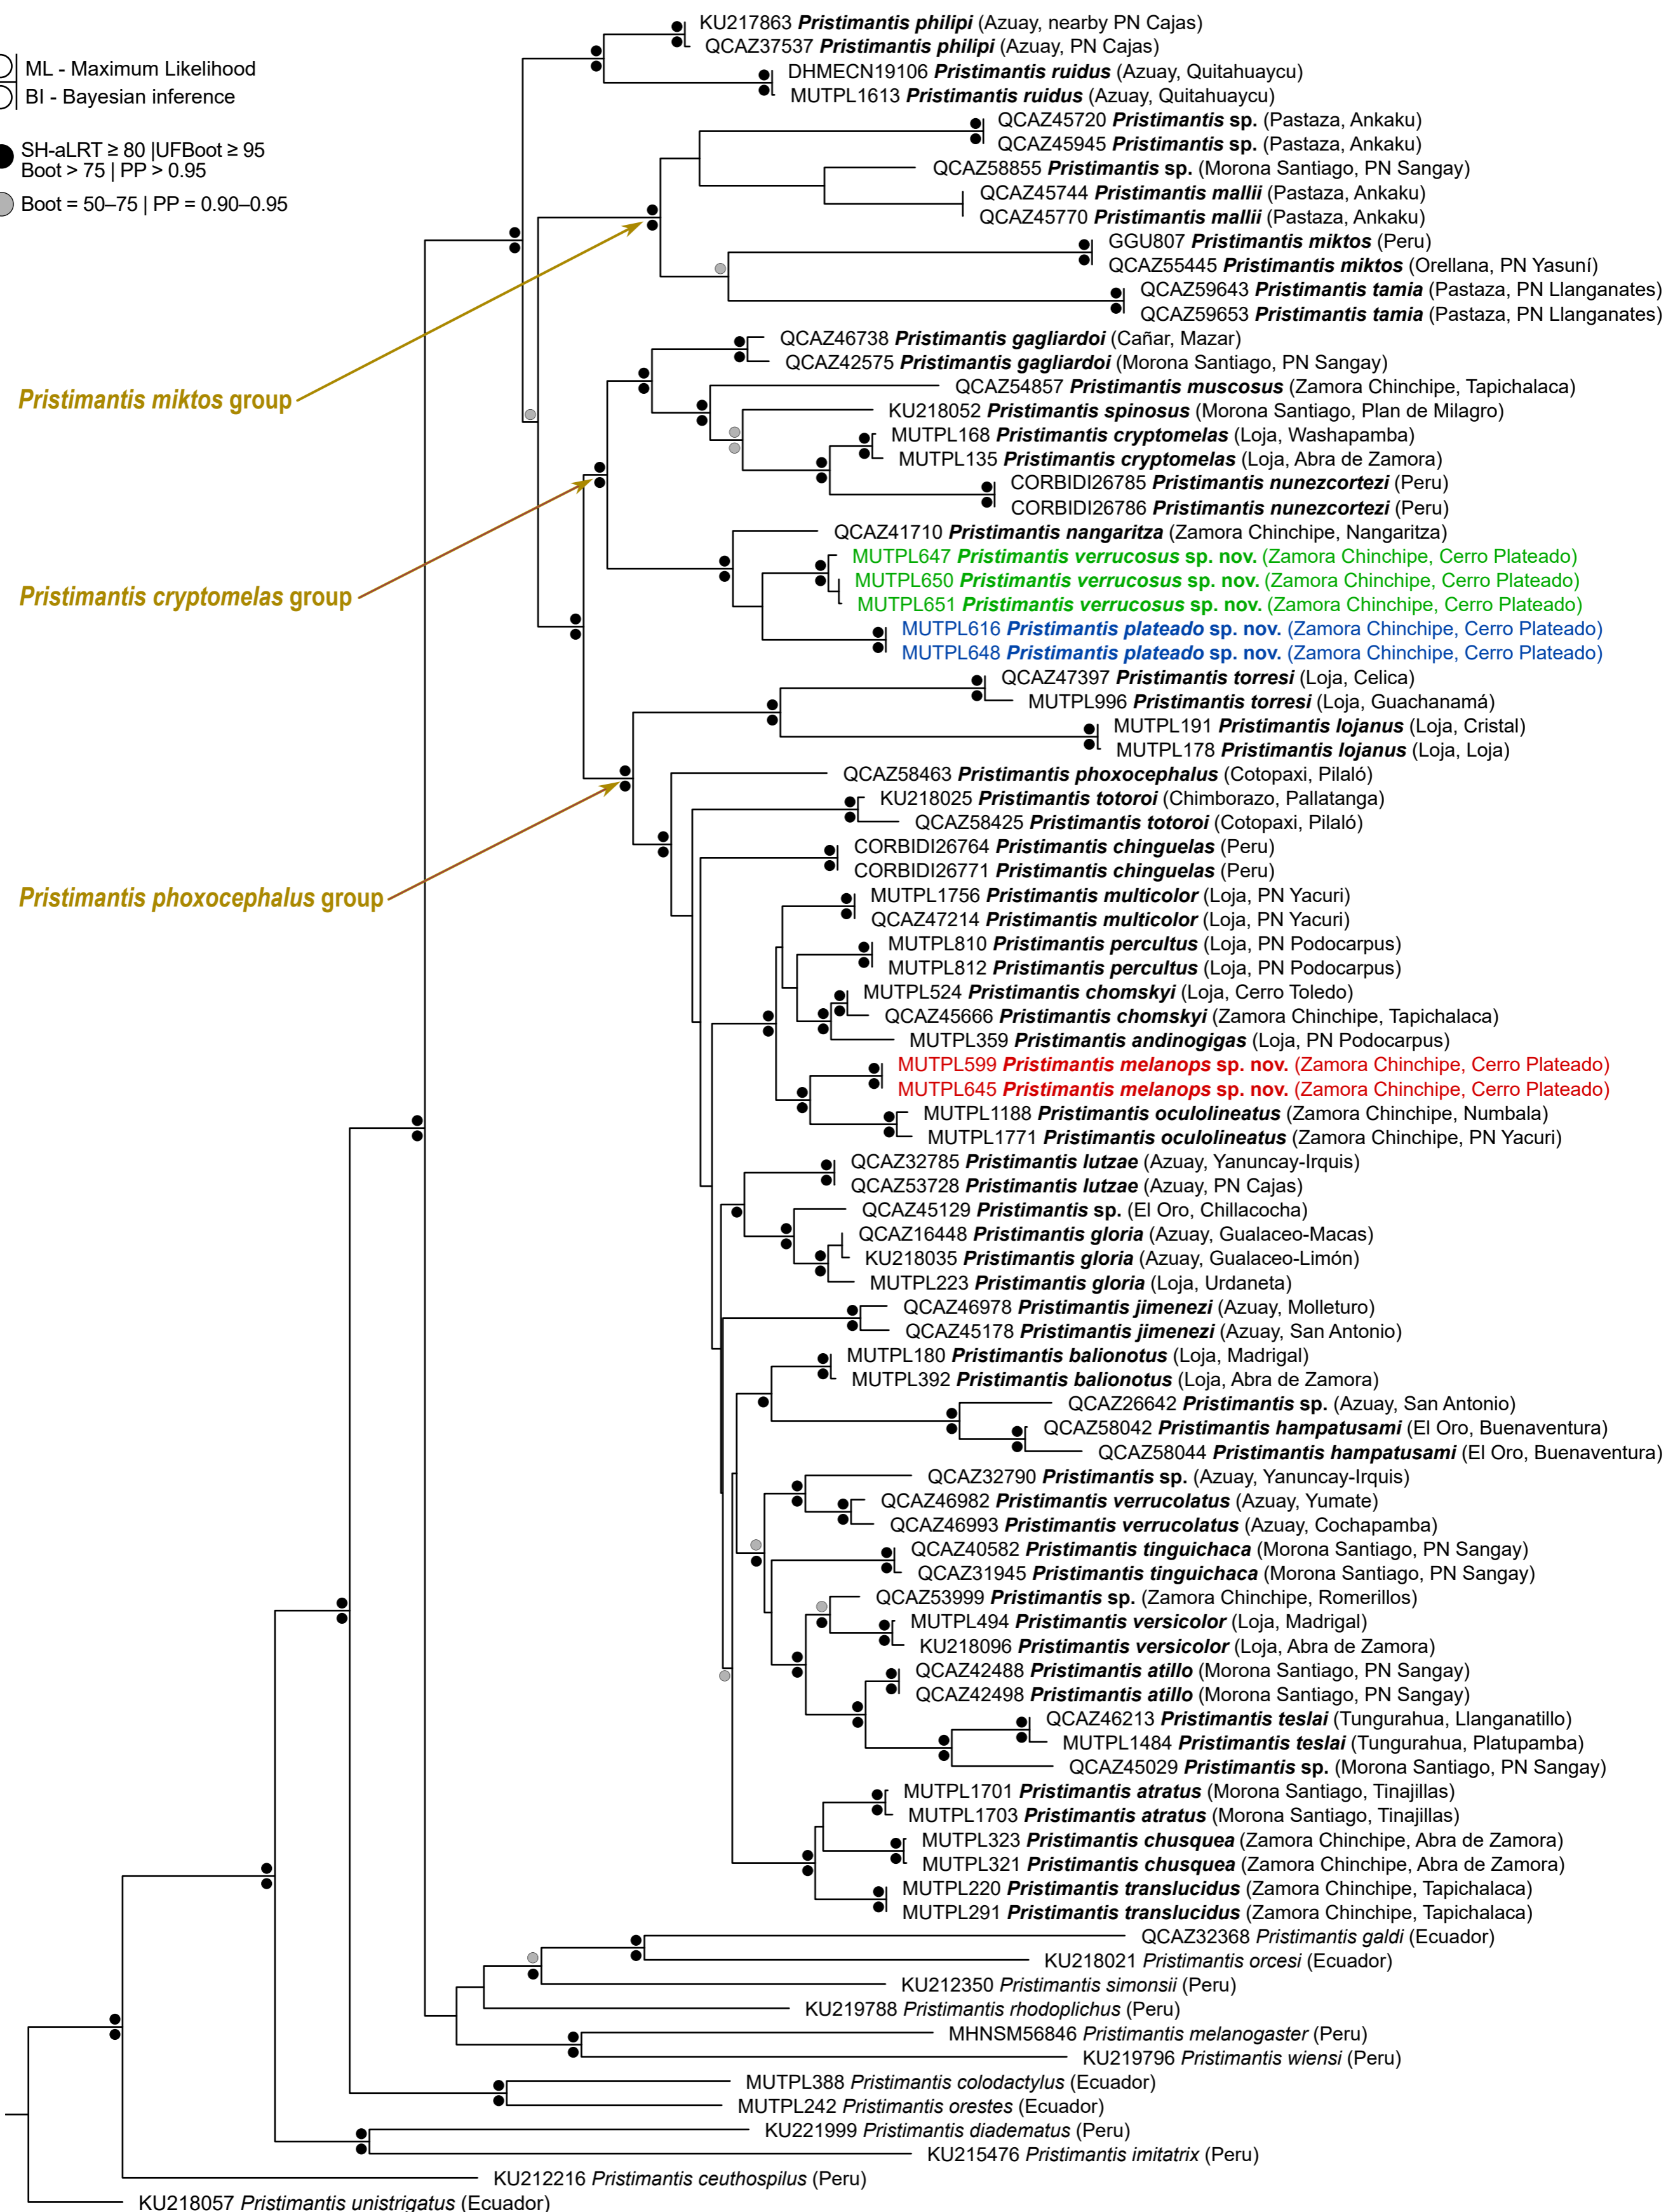

0.03
